# Supplementary material
Source: PubMed Central journal article supplement (PMC2940472)
Supplement: me.2010-0125_1.pdf [file me.2010-0125_1.pdf]

## **Supplemental Figure Legends**

**Supplemental Figure 1.** Growth curves of Calu-6 GFP ShRNA and ER $\beta$  ShRNA cells grown in phenol red-free media. Cell growth was measured by MTT assay ( $p < 0.05$ ,  $t$ -test).

**Supplemental Figure 2.** Western blotting of Calu-6 and 201T ER $\beta$  knock-down cells with anti-ER $\beta$  antibodies.

**Supplemental Figure 3.** Calu-6 GFP ShRNA and ER $\beta$  ShRNA cells were exposed to UV radiation and 48h later cell growth was measured by MTT assay. Values are represented as mean ( $\pm$ SD) from five identical wells.

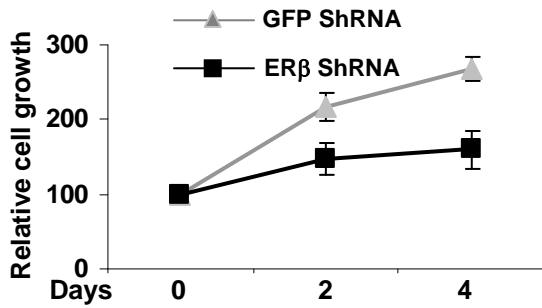

Supplemental Figure 1

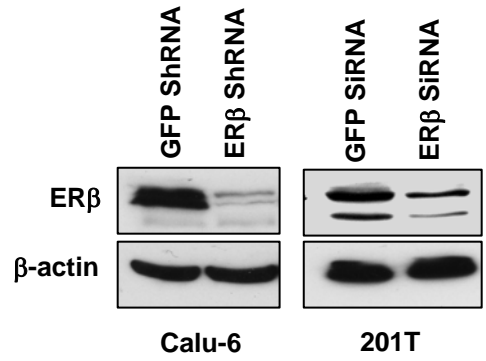

Supplemental Figure 2

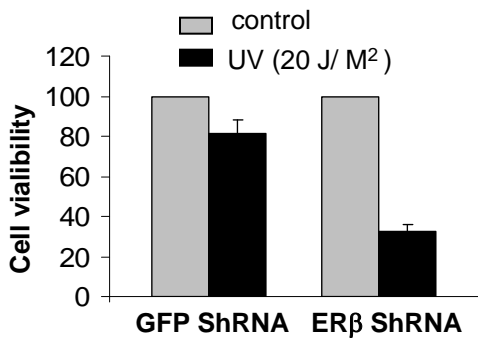

Supplemental Figure 3

| Electrostatic Interactions at the Interface |                      |              | Free-Energy Interactions at the Interface |                      |              |
|---------------------------------------------|----------------------|--------------|-------------------------------------------|----------------------|--------------|
| Energy [kcal/mol]                           | ER- $\beta$ Residues | BAD Residues | Energy [kcal/mol]                         | ER- $\beta$ Residues | BAD Residues |
| -11.121                                     | LYS-174              | ASP-123      | -9.495                                    | LYS-174              | ASP-123      |
| -3.065                                      | LYS-174              | PHE-121      | -1.945                                    | TYR-161              | LEU-114      |
| -2.762                                      | LYS-174              | ASP-119      | -1.853                                    | TYR-159              | LEU-114      |
| -1.818                                      | GLY-141              | GLU-89       | -1.716                                    | LYS-174              | PHE-121      |
| -1.286                                      | LYS-170              | GLU-120      | -1.4                                      | VAL-215              | LEU-159      |
| -1.24                                       | LYS-174              | SER-118      | -1.341                                    | LYS-174              | ASP-119      |
| -1.239                                      | ARG-175              | ASP-123      | -1.224                                    | HIS-180              | VAL-150      |
| -1.061                                      | GLN-178              | ASP-123      | -1.123                                    | HIS-160              | LEU-114      |
| -1                                          | LYS-216              | SER-163      | -1.081                                    | ILE-177              | TRP-147      |
| -0.832                                      | ARG-144              | GLU-89       | -0.962                                    | GLY-141              | GLU-89       |
| -0.519                                      | LYS-170              | ASP-123      | -0.915                                    | ILE-177              | VAL-150      |
| -0.488                                      | LYS-170              | MET-117      | -0.909                                    | HIS-180              | TRP-147      |
| -0.437                                      | TYR-161              | ARG-115      | -0.826                                    | ALA-171              | PHE-121      |
| -0.425                                      | LYS-174              | GLU-120      | -0.768                                    | GLN-178              | VAL-150      |
| -0.41                                       | LYS-170              | ASP-119      | -0.73                                     | TYR-159              | TYR-110      |
| -0.347                                      | LYS-216              | SER-164      | -0.611                                    | ILE-177              | SER-164      |
| -0.335                                      | LYS-143              | GLU-89       | -0.551                                    | ASN-181              | VAL-150      |
| -0.301                                      | LYS-216              | ARG-112      | -0.543                                    | ILE-177              | SER-163      |
| -0.29                                       | ARG-144              | GLU-88       | -0.532                                    | TYR-161              | SER-118      |
| -0.285                                      | LYS-170              | GLU-113      | -0.496                                    | VAL-163              | LEU-114      |

**Supplemental Table 1:** List of ER $\beta$  and Bad protein residues that contribute to the top 20 stabilizing electrostatic and free-energy contacts. The energy and the pair of residues involving in each interaction were estimated using FastContact 2.0 software.
